# Supplementary material for: Phylogenomic Analyses of Echinodermata Support the Sister Groups of Asterozoa and Echinozoa
Source: PubMed Central journal article supplement (PMC4368666; doi:10.1371/journal.pone.0119627), 2015-03-20
Supplement: pone.0119627.s006.pdf [file pone.0119627.s006.pdf]

| Species                              | Assembled Transcripts | Sample Source | SwissProt Transcripts | SwissProt N50 |
|--------------------------------------|-----------------------|---------------|-----------------------|---------------|
| <i>Aplysia californica</i>           | 26,249                | RefSeq        | 18,424                | 4,099         |
| <i>Branchiostoma floridae</i>        | 28,575                | RefSeq        | 21,881                | 2,127         |
| <i>Gallus gallus</i>                 | 36,995                | RefSeq        | 31,868                | 4,527         |
| <i>Homo sapiens</i>                  | 91,944                | RefSeq        | 77,696                | 4,208         |
| <i>Nematostella vectensis</i>        | 24,462                | RefSeq        | 18,261                | 1,609         |
| <i>Saccoglossus kowalevskii</i>      | 12,851                | RefSeq        | 10,936                | 2,294         |
| <i>Strongylocentrotus purpuratus</i> | 23,078                | RefSeq        | 19,554                | 4,363         |
| <i>Ophiocoma wendtii</i>             | 5,025                 | 454           | 1,995                 | 771           |
| <i>Ophionotus victoriae</i>          | 3,210                 | 454           | 694                   | 1,645         |
| <i>Parastichopus parvimensis</i>     | 107,585               | 72bp PE       | 34,809                | 3,076         |
| <i>Eucidaris tribuloides</i>         | 45,385                | 80bp PE       | 7,410                 | 1,307         |
| <i>Patiria miniata</i>               | 76,847                | 80bp PE       | 24,679                | 2,494         |
| <i>Oxycomanthus japonicus</i>        | 39,225                | 80bp PE       | 15,868                | 2,816         |
| <i>Ophiocoma echinata</i>            | 111,491               | 80bp PE       | 21,485                | 2,454         |
| <i>Lytechinus variegatus</i>         | 90,621                | 80bp PE       | 25,994                | 2,914         |
| <i>Asterias forbesi</i>              | 68,714                | 80bp PE       | 22,625                | 2,784         |
| <i>Sclerodactyla briareus</i>        | 58,273                | 80bp PE       | 19,297                | 3,154         |
| <i>Asterias rubens</i>               | 81,470                | 100bp PE      | 25,733                | 2,349         |
| <i>Henricia species</i>              | 137,160               | 100bp PE      | 36,754                | 2,231         |
| <i>Echinaster spinulosus</i>         | 119,580               | 100bp PE      | 34,231                | 2,314         |
| <i>Echinarachnius parma</i>          | 96,977                | 100bp PE      | 26,016                | 2,017         |
| <i>Leptasterias species</i>          | 108,544               | 100bp PE      | 33,803                | 3,172         |
| <i>Luidia clathrata</i>              | 84,380                | 100bp PE      | 23,407                | 1,835         |
| <i>Marthasterias glacialis</i>       | 118,847               | 100bp PE      | 28,327                | 1,928         |
| <i>Pisaster ochraceus</i>            | 37,111                | 100bp PE      | 10,361                | 1,225         |
| <i>Parastichopus californicus</i>    | 30,607                | 100bp PE      | 10,379                | 1,132         |
| <i>Sphaerechinus granularis</i>      | 92,460                | 100bp PE      | 24,024                | 2,008         |
| <i>Apostichopus japonicus</i>        | 85,061                | 100bp PE      | 26,902                | 1,943         |
| <i>Patiria pectinifera</i>           | 118,294               | 100bp PE      | 33,009                | 1,746         |
| <i>Asterias amurensis</i>            | 63,300                | 100bp PE      | 19,592                | 2,088         |
