# Supplementary material for: Phylogenomic Analyses of Echinodermata Support the Sister Groups of Asterozoa and Echinozoa
Source: PubMed Central journal article supplement (PMC4368666; doi:10.1371/journal.pone.0119627), 2015-03-20
Supplement: pone.0119627.s007.pdf [file pone.0119627.s007.pdf]

| <b>Sequence name</b>     | <b>Sequence trimmed</b>                                                                                                                                                                                                                                         |
|--------------------------|-----------------------------------------------------------------------------------------------------------------------------------------------------------------------------------------------------------------------------------------------------------------|
| 454 adapter A1           | TCCATCTCATCCCTGCGTGTCCCATCTGTTCCCTCCCTGTCTCA                                                                                                                                                                                                                    |
| 454 adapter A2           | TGAGACAGGGAGGGAACAGATGGGACACGCAGGGATGAGATGGA                                                                                                                                                                                                                    |
| 454 adapter B1           | CCTATCCCCTGTGTGCCTTGCCTATCCCCTGTTGCGTGTCTCA                                                                                                                                                                                                                     |
| 454 adapter B2           | TGAGACACGCAACAGGGGAAAGGCAAGGCACACAGGGGATAGG                                                                                                                                                                                                                     |
| matches found<br>326,555 | ACGAGCGGCCA                                                                                                                                                                                                                                                     |
| matches found<br>57,840  | GCCTCCCTCGCGCCATCAGCCGCGCAGGT                                                                                                                                                                                                                                   |
| matches found<br>9,664   | ATCGGTGATTAGTTGTTTCGGTCATCAAACCTTCCTTCACCCAAGGG<br>AATTTGGGGAGCCGCACAGAAACATGGTGGGTGTTACAATCTAAG<br>TGCTGATAGGACTTGCCTTAGTAGCTGCAGCCTAGATGAAGCGA<br>TCTGATTCTGATAATTCACCAGTGCAGCGAAAATTACAGCGCTTTG<br>AACCAGTGGAAAAGGCGCTATATAAATCCAAATTATTATTATTGG<br>CCGCTCGT |
| matches found<br>7,122   | ACCAAACCAGTACTAATGAAGAAAAAAAAA                                                                                                                                                                                                                                  |
| matches found<br>6,854   | GAGAGATAAATGATCTAAATGTGCGTTTATTCAAAAATAGATTTTA<br>AGCTGTGTTGATTGGGATGCTGTTTGT                                                                                                                                                                                   |
| matches found<br>7,591   | TCATCTGATGATGTCAATATATCATACAAGTCATTCATTGAGAAGT<br>TTAATGTAATGTACGAAGCGTGTTTT                                                                                                                                                                                    |
